# Supplementary material for: Differential features of early childhood motor skill development and working memory processing: evidence from fNIRS
Source: Frontiers journal article supplement (doi:10.3389/fnbeh.2023.1279648), 2023-09-26
Supplement: Table_1.xls [file Table_1.xls]

## Sheet: Sheet1
Serial number	sex	age(month)	height（cm）	weight(KG)	Motor skill score	group	2-memory load																								3-memory load
							ch1	ch2	ch3	ch4	ch5	ch6	ch7	ch8	ch9	ch10	ch11	ch12	ch13	ch14	ch15	ch16	ch17	ch18	ch19	ch20	ch21	ch22	ch23	ch24	ch1	ch2	ch3	ch4	ch5	ch6	ch7	ch8	ch9	ch10	ch11	ch12	ch13	ch14	ch15	ch16	ch17	ch18	ch19
1	male	54	1.03	17	5	Low motor skill	-0.1651	-0.6804	-0.6852	0.0157	-0.4712	0.1438	-0.1225	-0.3192	-0.3256	-0.5023	-0.5178	-0.1994	-0.2373	-0.5512	-0.0016	-0.1822	-0.0258	-0.0211	-0.6763	0.1686	-0.1977	-0.0814	-0.3937	-0.2791	-0.1979	-1.4099	-1.3628	-0.1672	-1.301	-0.8747	-1.4187	-0.3213	-0.0975	-0.7973	-1.589	1.0409	-0.9487	-1.4396	0.6269	-1.7199	-0.4521	-0.0402	-2.4102
2	male	61	1.13	20	6	Low motor skill	-0.7092	-0.2249	-0.6998	-1.1291	-0.6317	-0.5369	-0.2922	0.4842	-0.4421	-0.2983	-0.2188	-0.5536	-0.0672	-0.8031	-0.0497	-0.7854	-0.8342	-1.1504	0.6142	-0.1197	-0.9865	0.1052	-0.9222	-0.9628	-0.0098	0.3845	0.5537	0.1916	0.5752	-0.0408	0.6067	0.4179	0.1972	0.5282	-0.2555	0.4784	0.0081	-0.413	0.292	0.0439	0.1123	0.0507	0.1704
3	male	59	1.101	17.5	8	Low motor skill	0.0253	0.7162	0.6587	0.3885	0.129	0.2495	0.6164	0.3622	-0.1565	-0.3403	-0.239	-0.3037	-0.3287	-0.1905	-0.2767	0	-0.1175	0.0375	-0.0585	0.0259	-0.0382	0.2655	0.3058	0.1175	0.739	1.0173	1.6674	1.8602	1.352	2.1187	1.4634	1.0845	0.7011	0.491	1.3163	0.7548	1.1003	0.7878	2.0509	1.906	1.3203	0.9763	1.3791
4	male	63	1.135	23	8	Low motor skill	0.0733	0.0918	-0.1021	0.3492	0.304	0.1985	0.2002	-0.2382	-0.0575	-0.0655	0.5188	0.0088	-0.084	0.2341	0.0614	0.3457	0.2667	0.2558	0.8774	0.3166	-0.2223	-0.1267	0.3003	0.0989	0.0942	0.2878	0.3978	0.4598	-0.1354	0.2559	0.5109	0.1104	0.367	0.1587	-0.1286	0.1218	-0.3268	-0.1514	0.0439	-0.0974	0.1316	0.2399	0.0305
5	male	62	1.168	22	8	Low motor skill	-0.1907	-0.1136	0.2583	-0.0946	0.0929	0.1567	0.354	-0.0829	-0.1266	-0.376	-0.2762	-0.4443	-0.3587	-0.6818	-0.2583	-0.1563	0.0691	0.1928	0.1843	-0.2309	0.2148	0.1567	0.1904	-0.1433	0.0762	0.1927	-0.0388	0.1123	-0.0116	0.1097	0.3556	0.1019	0.2786	0.1158	-0.0962	0.2637	0.1509	-0.1387	0.2117	0.1323	0.1739	0.3303	0.3726
6	female	57	1.055	16.5	7	Low motor skill	-0.227	0.2449	0.4886	0.2756	0.2689	-0.316	-0.1553	0.0884	0.0291	0.0352	0.3697	0.0747	-0.2901	-0.0762	-0.0456	0.1281	0.1884	0.5334	-0.4009	0.1447	0.1976	0.2695	0.2149	-0.3447	-0.1504	0.6308	0.9049	0.5186	0.6366	0.0385	0.6717	0.0045	0.0044	0.2393	0.5906	0.2264	-0.2622	0.1498	-0.0542	0.3765	0.6433	0.509	-0.6314
7	female	59	1.085	17.5	6	Low motor skill	1.195	1.6538	-0.0935	0.0217	-0.0179	0.1393	0.6285	-0.4968	-0.8662	-0.2547	-0.1392	-1.4035	-0.7702	0.4997	0.0861	-0.3659	-0.4865	-0.375	-1.2295	-1.1881	-0.4152	-2.5256	-0.5394	-0.8986	0.6506	1.6654	-2.7281	0.3618	-0.7873	0.347	-0.4639	0.1142	-0.4076	-1.546	-0.1659	-0.3014	0.6843	0.3427	0.5085	-0.0496	-0.1911	0.4523	-0.081
8	female	61	1.16	21.5	8	Low motor skill	0.0274	-0.1696	0.3173	-0.0053	0.3594	-0.0852	-0.6325	0.0413	-0.205	0.1027	-0.1226	0.0052	0.2197	-0.3159	0.413	-0.1474	0.306	0.1875	0.1758	0.3236	-0.5504	0.1239	-0.0841	0.1084	-0.0204	-0.015	0.17	0.0302	0.2509	0.4042	-0.2936	0.1056	0.2877	0.3064	0.4095	0.1965	0.4765	0.2815	0.5802	0.4506	0.3076	0.1414	0.0138
9	female	62	1.07	17.5	7	Low motor skill	0.5267	0.1636	0.0219	0.3308	0.087	-0.0985	0.1457	0.4297	0.3252	0.0401	0.0966	0.3399	0.2207	0.0496	-0.0947	-0.17	0.1114	0.099	0.0433	0.2141	0.0003	0.0703	-0.0547	0.0909	-0.1737	-0.4357	0.4496	-0.2124	-0.242	-0.3919	0.0398	-0.1495	0.0006	-0.0299	0.032	0.4915	0.3603	-0.2035	0.0904	0.1402	0.2563	0.3033	0.2545
10	female	58	1.06	17	8	Low motor skill	0.5485	-0.0074	0.5419	0.3864	-0.0138	0.2885	0.0568	1.0296	0.7812	0.5721	0.1261	0.4096	0.178	0.0331	0.3437	0.4456	0.1036	1.1236	0.4112	0.8286	0.2636	0.2786	0.3082	0.8716	0.2323	0.2173	0.3343	-0.1003	-0.1584	0.0366	0.4503	0.4736	0.9069	0.1915	0.4204	0.314	0.025	0.368	-0.0839	0.6087	-0.1233	0.6426	-0.2672
11	female	62	1.08	21.1	8	Low motor skill	0.4412	0.343	0.5318	0.5335	0.3999	0.3248	0.4898	0.1704	0.3861	0.2584	0.3019	-0.0229	-0.5475	-0.1767	0.116	0.1261	0.0885	0.02	-0.1416	0.188	0.5051	-0.1134	0.1233	-0.135	0.2256	-0.2129	0.1429	0.0555	-0.0303	0.1371	-0.1953	0.0562	0.1234	0.1403	0.0812	0.0731	0.223	-0.2592	0.3295	0.2764	0.6524	0.3686	-0.0098
12	female	61	1.12	19.5	7	Low motor skill	0.0613	0.2493	0.0976	0.081	-0.0614	0.7579	-0.3116	-0.7832	-0.8479	-0.3694	0.3725	-0.2153	-0.0479	0.2819	0.3759	0.4659	0.1428	0.1494	-0.1319	0.3113	0.2031	-0.0262	-0.2132	0.0012	0.1853	-0.0738	0.3516	0.1778	0.1986	0.6828	-0.29	-0.4173	-0.4498	0.2091	0.6434	-0.2037	-0.3145	-0.1541	0.0138	0.1003	-0.2334	0.0899	-0.2294
13	female	63	1.125	19.8	8	Low motor skill	0.0255	-0.1039	0.3232	0.1709	0.1675	-0.0339	0.3668	-0.001	-0.2621	0.0269	-0.0726	-0.1728	-0.5818	-0.077	-0.7571	0.2098	-0.4425	-0.0115	-0.6862	0.0895	0.0738	-0.2977	-0.0034	-0.2597	-0.1729	0.8185	0.3111	0.4783	-0.4681	0.4765	0.5032	-0.6336	-1.5239	-0.0038	-0.8517	0.365	-2.5065	-0.4814	-2.2842	1.2214	-0.5554	0.2017	-1.4297
14	male	61	1.103	21.7	6	Low motor skill	-0.1007	-0.1077	0.0536	0.2672	0.2444	0.0856	0.0545	0.2243	0.2665	0.2884	-0.1852	0.1875	0.0396	-0.0262	0.0019	-0.0132	-0.0097	-0.1126	0.4874	0.048	-0.2785	-0.0737	-0.4224	-0.1568	-0.2507	-0.0918	-0.0403	-0.2615	0.0069	0.0148	-0.1786	0.2351	0.4134	0.1711	-0.3974	0.2306	-0.2468	-0.0266	-0.2973	-0.1142	-0.6856	-0.1492	0.5566
15	female	64	1.136	21	8	Low motor skill	0.093	-0.122	-0.0513	0.2261	-0.068	0.0101	-0.0222	-0.1608	-0.2003	-0.1473	-0.0993	-0.1936	-0.2795	-0.2938	-0.1432	0.0432	0.0286	0.2505	-0.3992	0.0329	0.1855	-0.1112	0.2712	0.0597	0.124	0.5611	0.3217	0.3312	0.0223	0.3113	0.694	0.3238	0.2752	0.309	0.1422	0.2903	-0.292	-0.2318	-0.1598	0.27	0.0414	0.551	-0.4451
16	male	59	1.118	21.5	7	Low motor skill	-0.0127	-0.1366	0.1657	0.0962	-0.0191	-0.072	-0.0904	-0.0913	-0.2012	0.0106	0.122	0.1655	0.0593	-0.0861	0.5308	0.0868	0.3463	0.2316	-0.5729	-0.1413	-0.616	-0.2539	-0.7285	-0.2525	-0.1975	-0.2118	-0.0954	0.3037	0.1293	0.3185	0.2693	0.0576	-0.0172	0.3148	0.1245	-0.2154	-0.4173	-0.0254	0.4121	-0.1271	0.2156	-0.1496	-0.345
17	male	63	1.107	21.3	7	Low motor skill	0.2823	-0.3038	-0.2453	0.0168	-0.0076	-0.055	-0.2418	-0.4882	-0.369	-0.2297	-0.4237	-0.499	-0.3721	-0.0954	0.1041	-0.2816	0.0326	-0.268	-0.6297	-0.0478	-1.1289	-0.0382	-0.429	-0.2422	0.0511	-0.5707	0.2261	-0.0046	0.7001	0.1653	-0.3189	-0.1421	-0.4961	0.4183	-0.2024	-0.0392	-0.2863	-0.2277	-0.0133	-0.2786	0.0257	-0.2119	-0.5841
18	male	63	1.195	25.2	7	Low motor skill	0.0284	-0.1395	0.0982	-0.1171	-0.308	-0.2762	-0.8416	-0.2807	-0.8944	-0.4165	-0.4445	0.0048	-0.5651	-0.008	-0.2631	-0.3066	-0.0733	0.0329	-1.1255	-0.6017	-0.5409	-0.1843	-0.0334	0.1855	0.0471	0.4265	0.706	0.4631	0.5076	0.0832	0.4731	0.3635	0.1448	0.2301	-0.1048	0.1726	-0.336	0.2498	0.3606	0.0192	0.3726	0.2796	-0.2501
19	male	61	1.16	20.4	7	Low motor skill	-0.0179	-0.1691	0.2338	-0.175	0.0199	-0.0869	-0.026	0.1706	0.4969	0.2617	0.0966	0.5555	0.1733	0.029	0.2879	0.0913	0.055	-0.1235	0.2031	0.1661	0.0354	0.1078	-0.0324	-0.0777	0.4827	1.007	1.1773	0.5065	0.7072	-0.0231	0.1055	0.4717	0.3516	0.2991	-0.1406	0.4694	-0.0759	-0.6279	0.0125	0.2061	0.6731	0.8245	0.6805
20	female	64	1.065	17.6	5	Low motor skill	0.2512	0.1951	0.1854	0.5247	0.2352	0.6138	0.5815	0.2516	0.0004	0.6787	0.3351	0.5943	-0.0365	0.4283	-0.0315	0.9818	-0.0133	0.546	-0.4657	-1.1464	0.7286	0.4936	0.5149	-0.0401	0.0409	-0.2107	0.2221	0.1088	-0.1772	-0.051	-1.4849	-1.0232	-1.3617	-0.1549	-0.2259	-0.0584	-1.3705	-0.3504	-0.8423	-0.1535	-0.741	-0.3156	-1.3217
21	female	65	1.155	19.2	8	Low motor skill	-0.1275	0.316	0.2561	0.1243	0.9948	0.6252	0.4232	0.4938	0.2221	0.6659	0.7349	0.085	0.0813	0.2348	0.2891	0.4043	0.4047	0.3187	-0.0571	0.0509	-0.2236	0.013	-0.1259	0.2071	0.0348	-0.2982	0.356	0.0456	0.8223	0.3635	-0.0302	0.4438	0.5808	0.4509	0.3455	-0.1476	0.1345	-0.1384	0.2551	-0.0836	0.2315	0.2523	0.0925
22	male	59	1.115	18.9	7	Low motor skill	-0.0982	-0.5983	-0.4624	-0.1312	-0.2923	0.1641	-0.2415	0.0224	-0.6706	0.1978	0.4068	0.0106	0.4124	0.0758	0.2908	-0.0957	0.2164	0.1854	0.5518	0.0874	-0.066	-0.1992	-0.0884	-0.3157	-0.8819	0.4174	0.5231	-0.1535	0.1418	0.2334	0.6237	0.175	-0.291	0.2207	0.1795	0.9013	-0.0587	-0.4305	0.5282	-0.252	0.4085	-0.1921	-0.3213
23	female	62	1.125	16.8	8	Low motor skill	0.2428	0.0551	0.8185	0.0737	0.8168	-0.3425	-0.6437	0.4229	0.9205	0.5402	-0.2407	-0.4145	-0.5376	0.1429	-0.1243	0.0273	-0.0312	0.4382	0.662	-1.4573	0.5277	-0.3086	0.2553	-0.0489	-0.397	-0.9091	-0.2881	-0.2279	0.0824	-0.9267	-0.7859	-0.015	1.593	0.4602	-0.7682	0.3135	0.6553	0.1681	0.422	0.059	-0.0193	0.0597	0.9879
24	male	58	1.14	18.7	8	Low motor skill	0.3051	0.2652	0.4053	0.0977	0.1565	0.7097	1.0005	0.1633	0.1718	-0.0475	0.4509	-0.4993	0.1981	-0.269	0.9079	0.1774	0.3311	0.1178	1.7716	1.1137	-0.0784	0.1408	-0.2095	0.1248	-0.444	0.0361	-0.0673	-0.2584	-0.0547	0.0416	0.2783	-0.0905	-0.0451	-0.0144	0.0999	-0.3289	0.2867	-0.142	0.9025	0.1513	0.7316	0.1847	1.0781
25	female	61	1.14	19.9	8	Low motor skill	0.569	0.7897	0.3059	0.5433	0.6341	0.4458	0.0821	0.1067	0.6388	0.3842	0.5727	-0.3109	0.7336	0.5058	1.477	0.7441	0.7464	0.6189	1.0179	1.4904	0.4094	0.5511	0.352	0.4706	0.1638	0.2942	0.1507	-0.0382	0.3674	0.6469	-0.4869	0.1671	0.9966	0.1635	0.5855	-0.3792	0.6045	0.1365	1.0853	0.5221	0.446	0.5472	0.9519
26	male	65	1.11	18.4	6	Low motor skill	-0.2572	-0.2486	0.3799	0.1405	0.3803	0.278	0.4915	-0.0187	0.6909	0.4506	0.0209	0.292	0.2884	0.551	0.6084	0.7811	0.6745	0.6451	0.3232	0.0338	0.6465	0.4858	0.718	0.1846	-0.5317	-0.2827	-0.1755	-0.143	0.2188	0.4692	0.8504	1.2561	1.7468	0.1524	0.0074	0.2589	0.7767	0.1693	0.1737	0.3318	0.104	0.5842	0.7162
27	male	56	1.11	20.8	8	Low motor skill	0.3359	0.4517	0.3036	0.5088	-0.3179	0.8514	0.8953	0.6942	0.9766	0.1234	0.3289	0.6245	0.3909	0.3449	0.3114	0.494	0.4167	0.7914	0.4785	0.0664	0.252	-0.2275	0.4301	0.3346	0.0531	0.567	0.3438	0.2773	-0.3513	0.7369	0.7856	0.4922	1.3931	-0.6343	0.7339	0.172	0.596	0.5056	0.6447	0.757	0.8478	0.7338	0.9119
28	female	62	1.085	18.2	7	Low motor skill	-0.4477	0.3013	0.3118	0.0849	-0.5952	0.5551	0.4524	-2.0077	-0.9827	-0.6447	-0.3237	0.1219	-0.2011	-0.5499	-0.4893	0.6052	-0.5708	0.2349	-0.4631	0.1142	0.7224	-1.5527	0.61	-0.985	-0.1611	0.1865	1.7859	0.1533	1.0945	0.283	3.1246	4.2531	2.8544	0.4183	0.1368	0.1852	0.2954	0.5848	-1.3165	0.3405	-0.6689	0.2263	1.4071
29	female	60	1.08	18.4	8	Low motor skill	0.431	0.2376	-0.1153	-0.1801	-0.4637	0.1095	-0.5709	-0.9711	-0.8099	-0.1064	0.2597	0.3843	-0.6008	-0.4279	-1.0481	0.3751	-0.2458	0.5472	1.6788	-0.5976	-1.8589	0.825	-1.6195	0.3438	-0.0678	0.3362	-0.6537	-0.1618	-0.3286	-0.2727	-0.4243	-0.5647	-0.3168	-0.2806	0.1011	-0.1709	0.3656	-0.1434	-0.4679	-0.2167	-0.6426	-0.2246	0.3559
30	female	55	1.04	15	8	Low motor skill	0.3165	0.5508	0.6744	0.6421	0.1974	0.4096	0.3497	-0.181	-0.0861	-0.2483	0.1726	-0.8429	-0.18	-0.1724	-0.3504	0.2575	-0.1165	0.5141	0.0961	0.1806	0.802	0.6313	0.6829	0.3523	0.9424	1.0032	0.7975	1.6033	1.7923	2.4046	1.2568	-1.6614	-0.4738	0.4523	1.3711	0.3131	0.0505	1.1748	-0.5262	1.0372	-0.1784	0.7536	-0.4023
31	female	64	1.11	19.9	8	Low motor skill	-0.3539	-0.45	-0.7631	-0.6403	-0.6457	-0.4686	-0.9871	-1.1107	-0.9079	-1.9954	-1.0552	-1.7393	-0.8106	-0.2166	-0.1164	-1.0694	0.6985	0.8678	-1.2772	-0.0304	-1.1986	-0.6164	-0.5811	0.3454	-0.3894	-0.2433	0.6397	0.2943	1.2774	-0.1921	0.1837	-0.0042	-1.8274	0.9236	-0.024	-0.8646	-0.7255	-0.294	-0.2128	-0.0641	0.4565	0.3926	-0.3352
32	male	59	1.105	18.9	8	Low motor skill	0.4583	0.3125	0.3692	0.3394	-0.2578	0.617	0.6479	1.9565	-0.4721	-0.0939	0.1412	-2.1178	0.0142	0.7289	-1.7856	0.5865	-0.7726	-0.0957	-0.8996	3.5883	-1.317	-1.8749	-0.1013	-0.4279	-0.9307	-0.3754	-0.2287	-0.084	-0.0184	-0.2585	-0.0331	0.3684	0.2973	0.5334	-0.3303	0.0494	0.2157	-0.2804	0.0174	0.3156	0.4905	-0.153	-0.1419
33	male	62	1.06	15.5	6	Low motor skill	-0.2431	0.0672	0.0002	-0.0372	0.5552	-0.338	0.1418	0.1669	-0.6847	-0.4466	-0.3975	-0.7093	-0.1414	-0.6256	-0.2166	-0.0603	-0.3175	0.0162	-1.053	0.0521	-0.2833	-0.3644	-0.2798	-0.2671	-0.2841	0.627	-0.9918	2.3585	1.2432	2.0717	-1.0224	-4.0374	-1.5376	4.0539	-1.236	-1.4911	-0.178	-0.3461	-0.7683	0.4848	-0.297	0.1347	-0.1874
34	male	55	1.1	16.6	7	Low motor skill	0.2823	0.1291	0.7213	0.1841	0.3797	0.3347	0.1066	0.2941	0.2234	0.178	-0.239	0.1978	0.3681	-0.3098	0.4619	-0.0385	0.0566	0.0623	0.4874	0.55	-0.0188	0.0021	0.1041	-0.3157	0.2635	0.754	0.7918	0.5357	0.3555	0.2035	1.1009	0.5444	0.4142	0.2057	-0.1417	-0.1509	-0.4887	-0.5693	-0.3142	0.1486	0.6927	0.5907	0.1798
35	male	63	1.11	19.4	5	Low motor skill	-0.162	0.5134	0.244	0.1753	0.1008	1.4781	0.3193	-0.9283	0.0799	-0.1857	0.8011	-0.1784	0.5279	0.307	0.1581	0.9925	-0.0458	0.4982	0.6773	0.9764	0.3888	-0.8532	-0.1759	0.0241	1.1005	0.9118	0.4616	0.5907	-0.5647	0.6909	2.0991	1.325	2.3375	-0.3958	0.1757	0.4176	1.0196	-0.2481	0.4558	0.9879	0.1474	0.6943	1.9546
36	female	63	1.155	20.7	7	Low motor skill	0.3022	0.4351	0.6567	0.6726	0.3567	0.5084	0.3669	0.3621	0.2563	0.2297	-0.0964	-0.1076	-0.1344	-0.1564	0.278	0.5441	0.8257	0.5342	0.2249	0.5643	-0.2375	0.4208	0.2051	0.0631	-0.1052	0.1312	0.0739	0.4623	0.1317	0.1337	0.011	-0.3046	-0.8138	0.0346	-0.3429	-0.1751	-0.2023	-0.3358	0.0786	-0.1199	0.0581	0.0709	-0.9002
37	male	59	1.155	21.2	5	Low motor skill	0.0417	0.3293	0.0394	-0.0983	-0.0415	-0.2312	0.4242	-0.1541	0.3619	0.0084	-0.4077	-0.0861	-0.164	-0.3048	0.191	0.0956	0.114	0.2602	-0.4616	0.0813	1.2602	0.178	0.4484	0.2787	0.2733	0.5539	-0.1638	0.4063	-0.2457	0.2258	0.7297	0.0868	0.1381	-0.0166	0.062	-0.1238	0.0574	-0.365	-0.0567	-0.4109	-0.2295	-0.1111	0.268
38	female	60	1.1	16.7	7	Low motor skill	-0.2832	-0.3328	-0.3297	-0.0754	0.1366	-0.1262	-0.1726	0.086	-0.2297	-0.1052	-0.1453	-0.2701	0.3144	0.038	0.2076	-0.3391	0.2115	-0.0281	0.3346	0.3842	0.7299	0.1194	-1.1529	-0.0813	-0.7734	-0.3024	-0.5336	-0.6093	-0.4008	-0.2992	-0.2925	-0.4856	-0.6379	-0.3496	-0.5403	-0.1788	-0.2115	-0.3175	-0.2591	-0.4966	-0.1016	-0.4413	0.0871
39	male	62	1.115	18.5	7	Low motor skill	-0.2106	-0.0591	-0.7638	-0.0875	-0.1212	-0.5619	-0.1302	-0.0121	-0.3316	0.014	-0.97	0.2616	-0.5868	-0.3424	-0.4666	-0.4437	-0.5329	-0.5594	-0.4455	-0.148	-0.3148	-0.8021	-0.534	-0.6352	-0.4418	-0.4015	-0.0375	-0.1044	-0.1427	-0.473	-0.2864	-0.3432	-0.6951	-0.4713	-0.6087	-1.0484	-0.84	-0.6328	-0.7856	-0.9294	-0.8607	-0.7897	-0.8074
40	male	55	1.07	17.1	8	Low motor skill	-1.2314	-0.7089	-0.8214	-0.9563	-0.2031	0.2216	-0.2704	-0.5988	-0.0018	-0.1191	-0.0793	-0.432	0.4269	-0.0959	-0.1712	0.0412	-0.2969	-0.1076	-0.3089	-0.241	0.1157	-0.249	0.3207	-0.2382	0.0696	0.2158	0.4614	-0.134	0.1032	0.9555	0.8241	0.3052	0.6042	0.4008	0.9	0.2668	0.679	0.7996	1.1152	0.5233	0.9486	0.7314	0.5385
41	female	56	1.12	20.3	8	Low motor skill	-0.5953	-0.1074	0.034	-0.5684	-0.2198	-0.4764	0.5085	-0.2131	-0.0758	-0.2875	-0.5033	-0.3322	0.3687	-0.1583	-0.0497	-0.1319	-0.2408	-0.1616	0.6005	0.0629	0.2189	0.0058	-0.2189	-0.4483	-0.1278	-0.1198	0.1638	-0.2889	0.3305	0.0996	0.3615	0.2306	0.0628	0.4099	-0.0505	0.1942	0.2001	-0.0349	0.4144	0.4707	-0.0466	0.28	0.3411
42	female	61	1.06	14	6	Low motor skill	0.0218	-0.3934	0.0625	-0.1654	-0.1258	-0.2594	-0.6369	-0.4411	-0.0986	-0.155	-0.1565	0.1507	-0.285	-0.5967	-0.2956	-0.4679	-0.3326	-0.9493	0.0435	-0.1604	-0.2048	-0.1941	-0.2199	-0.5417	-0.2095	-1.0079	0.5361	-0.0722	0.1627	0.0854	-1.0973	-0.6779	-0.1533	0.2092	-0.2558	0.2357	-0.4448	-0.5749	-0.3917	-0.2621	-0.3371	-1.0168	-0.0082
43	female	61	1.09	17.5	7	Low motor skill	0.1679	-0.1737	-1.7698	0.4668	-1.3561	0.5596	0.5359	-1.0942	0.2747	-1.7209	0.8442	4.0217	0.2312	0.0496	0.2199	-0.4312	-0.3563	0.2768	-4.5161	0.0973	0.3799	0.1454	-0.5126	-0.3504	-0.9284	-1.2424	-0.3074	0.3181	-0.1269	0.3191	-0.2004	-2.2452	-0.6464	-1.0589	-0.2289	-1.4253	-1.1663	-0.6935	-0.6208	-0.753	-1.1452	0.0666	-1.8093
44	male	62	1.13	33.5	7	Low motor skill	-0.0565	0.0703	-0.2758	-0.0242	-0.3493	-0.0169	0.147	-0.0888	-0.0923	-0.1826	-0.2163	0.0111	0.7132	-0.4108	0.0609	-0.0083	-0.0361	-0.1411	-0.0468	0.9162	0.0066	-0.4379	-0.6977	-0.1174	0.4206	0.7394	0.3283	0.7891	0.3755	0.7778	0.6504	0.3607	0.3616	0.2554	0.0924	0.4463	2.7885	0.0476	1.4234	0.4857	0.3537	0.422	0.8262
45	female	60	1.09	19.3	6	Low motor skill	0.0657	0.0401	-0.0883	-0.0573	-0.1668	-0.3473	-0.4213	0.0657	-0.0821	-0.221	-0.4865	-0.6218	0.2872	-0.007	0.2233	-0.1395	-0.0283	-0.1206	0.5141	-0.3393	-0.1053	0.3117	0.2958	0.118	0.0434	-0.2392	0.3306	-0.3202	0.4892	-0.5432	-0.3848	0.752	0.1312	0.3899	0.1385	0.5297	0.306	0.222	0.2524	-0.1781	0.0936	-0.16	0.478
46	female	55	1.04	18.2	7	Low motor skill	-0.1659	0.719	0.3496	0.3929	0.6428	0.8901	1.0362	0.1665	-0.3017	-0.0691	0.6969	-0.3162	0.6878	0.6006	0.6371	1.0743	0.7144	0.7998	-0.1863	-0.2871	0.8863	0.3166	0.3645	0.2101	-0.4949	-0.1099	-0.1215	0.2804	0.416	0.6257	0.628	0.0369	0.4499	0.4961	0.1017	-0.0141	0.9185	0.7145	0.2501	0.8437	0.2338	0.281	0.5364
47	male	61	1.188	21	9	High motor skill	0.1579	0.2421	0.1574	0.0648	0.0254	0.1649	-0.3122	-0.0198	-0.2572	-0.0048	-0.2455	-0.5676	-0.3064	-0.5464	-0.3307	-0.4164	-0.2736	-0.142	0.1164	-0.0544	0.2192	-0.1753	0.4648	0.0293	0.207	0.5295	1.2085	0.8982	0.6568	0.5485	0.5516	0.6057	0.2485	0.3984	0.2737	0.0629	-0.0742	-0.1995	0.096	0.1826	0.3697	0.5602	-0.2043
48	male	62	1.168	20	12	High motor skill	0.1182	0.2049	0.4944	0.2479	0.6313	0.4655	0.4689	0.4326	0.407	0.6801	0.5118	0.2557	0.5412	0.4611	0.3756	0.6462	0.3874	0.4835	0.762	0.8002	0.8872	0.5494	0.5877	0.3132	-0.1744	0.0199	-0.0441	0.1799	0.489	-0.0365	-0.1898	0.2905	-0.175	0.6106	-0.5388	0.0316	1.4053	-0.1524	-0.0968	0.1157	0.5765	0.5425	2.1969
49	male	55	1.09	22	10	High motor skill	-0.001	-0.422	-0.0604	0.0813	0.0064	-0.0195	0.2737	0.2206	0.217	-0.0805	-0.1233	-0.123	-0.1434	-0.1187	-0.0626	0.1434	0.1584	-0.0501	-0.0762	-0.1593	0.2451	-0.3407	-0.5352	-0.1773	0.0508	-0.3134	-0.1138	0.3801	0.0445	0.3313	0.2591	-0.0643	0.0179	0.063	0.2567	-0.0023	0.0565	0.146	0.1716	0.4001	0.1952	0.2691	0.666
50	male	59	1.125	18.5	12	High motor skill	0.5415	0.4787	0.8929	0.7128	0.5689	0.9548	1.3844	0.8793	-0.0136	-0.0457	1.0532	1.4006	1.0325	0.2429	0.4513	0.3436	0.4699	0.5187	1.5097	-0.6478	0.0614	-0.0388	-0.0993	0.4394	0.4145	0.9086	1.04	0.3569	0.6012	0.6	0.6875	4.4577	2.2478	0.0371	-0.3916	0.5222	0.8099	-0.4819	0.1982	0.5964	0.4133	0.1718	1.1903
51	male	64	1.125	21.5	11	High motor skill	-0.2679	-0.4495	0.0751	-0.1759	0.192	-0.1853	-0.3255	0.1087	0.237	0.0572	-0.6601	-0.1186	0.1231	-0.0435	0.1846	0.4116	0.2009	0.03	0.1614	0.2655	0.0662	-0.1859	-0.0776	-0.1465	0.1945	0.0853	0.0498	0.2654	0.072	0.3025	0.3763	0.0647	0.3811	0.1683	0.1778	0.3118	0.2057	0.235	0.0742	0.2737	0.259	0.2737	0.0802
52	female	65	1.14	22	9	High motor skill	-0.1409	0.6008	-0.0039	-0.0692	0.3223	0.1306	0.3945	0.109	0.5119	-0.0374	0.226	-0.0752	-0.354	0.1481	-0.0159	0.0823	0.2351	-0.1768	-0.2765	0.2209	-0.4243	0.0134	-0.652	-0.23	0.2233	1.1282	0.9526	0.57	0.5693	1.0976	1.2293	0.5721	-0.328	0.6441	0.8105	0.4431	0.1872	0.6576	0.5216	1.2374	0.332	0.6442	0.425
53	female	65	1.19	23	11	High motor skill	-0.1607	-0.1706	-0.0757	-0.108	0.0067	-0.291	-0.343	-0.0602	-0.259	-0.2183	-0.4105	-0.1541	-0.0894	-0.1754	-0.1179	-0.0669	0.0512	0.0321	0.2939	-0.1465	-0.5943	-0.0037	0.012	-0.1045	0.0548	0.052	0.4908	0.4484	0.3216	0.3786	-0.1623	0.1953	0.1236	0.151	0.2229	0.2988	0.2313	0.3538	0.3237	0.1585	0.3295	0.3061	0.4901
54	female	60	1.18	20.5	10	High motor skill	-0.0597	0.1217	0.2308	0.332	0.3537	0.3509	-0.0981	-1.4823	-1.81	-0.3968	0.6638	-0.5936	-0.6944	1.1554	-0.0269	0.5863	0.1901	0.2061	-1.2575	-5.1408	-0.1678	-0.2432	-0.1399	-0.0515	-0.1345	-0.2554	0.5762	-0.1682	0.5064	0.1898	-0.3259	0.1533	0.4653	0.7837	0.2197	0.527	1.0856	0.5496	0.5401	0.0912	0.4034	0.1158	-0.7485
55	female	59	1.109	21	12	High motor skill	0.0238	-0.0431	-0.1303	-0.1676	-0.0719	-0.4946	-0.2128	-0.0972	0.2039	-0.1751	-0.3698	-0.1058	0.1474	0.1702	0.4142	0.0502	-0.1469	-0.4739	0.4359	0.1676	0.1704	-0.322	0.0419	-0.2932	0.2634	0.0917	0.1992	0.2663	-0.0737	0.179	-0.3093	-0.1602	-0.1878	-0.1715	-0.2023	-0.4409	0.0931	0.2587	-0.0592	0.3136	-0.2655	0.1607	0.4359
56	female	59	1.065	20.5	11	High motor skill	-0.0433	0.2557	0.1366	0.2046	0.3112	0.2585	0.4119	0.1007	0.2762	0.0646	0.0484	0.1482	-0.0266	-0.0769	0.0048	0.5253	0.2055	0.4841	0.0192	-0.0827	0.2049	-0.1099	0.0576	-0.0688	-0.1371	0.183	0.4798	0.1753	0.4223	0.2324	-0.5163	0.4153	0.8835	0.1134	-0.0326	0.0058	0.1354	-0.1602	0.4755	0.6089	0.6388	0.5795	0.0853
57	female	54	1.07	19	13	High motor skill	0.2637	0.8907	0.8689	0.4572	0.7236	0.6762	1.347	0.4741	0.7643	0.8291	0.1953	0.6611	0.2266	0.4545	-0.1373	1.0962	0.7477	0.8258	0.1911	-0.0468	1.1778	0.2222	0.141	0.3427	0.6641	0.9304	1.0012	1.2195	0.8731	1.0345	1.2753	0.7507	0.948	0.6972	0.7959	0.739	0.2355	0.4395	0.3331	0.9505	0.6905	0.7185	0.3506
58	female	63	1.18	22	11	High motor skill	0.3787	0.1562	0.3387	0.3976	0.0528	0.4334	0.351	0.4675	-0.1016	0.1324	0.4465	-0.0971	0.5529	0.4341	0.5265	0.7129	0.3758	0.4647	0.4694	0.3082	0.6822	0.6221	0.8968	0.686	0.3086	0.4448	0.5016	0.3837	-0.0744	0.4526	0.9785	0.514	-0.0861	-0.2125	0.1193	-0.245	0.386	0.7142	0.2087	0.5992	0.066	0.6349	0.6579
59	female	65	1.13	24.5	13	High motor skill	-0.2641	-0.5227	-0.1602	-0.0863	-0.061	-0.1567	0.0929	0.1815	1.3976	0.1086	-0.3215	0.9867	0.0532	-0.1628	0.5245	0	0.0642	0.0103	3.901	0.3681	0.1789	-0.319	-0.7326	-0.0033	0.6098	0.4271	0.5196	0.5818	0.4238	0.4092	0.4921	0.2259	0.3022	0.4657	0.6105	0.6719	0.4605	0.7111	0.6779	0.8267	0.6893	0.62	1.0412
60	female	62	1.11	19.2	9	High motor skill	-0.3618	-0.0603	0.2802	0.2145	-0.2811	0.162	-0.2112	0.0732	-0.2277	-0.0943	-0.6258	-0.0691	0.3043	-0.4502	0.4423	-0.2535	0.6175	-0.0763	-0.1438	0.058	-0.3117	0.6208	-0.2682	-0.6031	-0.2177	0.4919	0.566	0.367	0.1006	-0.0298	0.2038	0.3559	0.0107	0.1014	-0.1181	0.2575	0.5615	-0.1343	0.5617	0.0996	0.4685	0.159	0.4001
61	male	59	1.126	22	12	High motor skill	0.6309	0.5283	0.5081	0.9154	0.0638	0.4192	-0.152	-0.2034	-0.303	-0.0485	0.1194	-0.1718	0.1181	0.1531	0.4708	0.8653	0.55	0.6452	-0.1371	0.2147	-0.3615	1.133	0.3977	0.5301	0.4616	1.1874	0.4056	0.8256	-0.0325	0.5649	0.4248	-1.0393	-0.1573	-0.1269	-0.067	-0.1107	0.6763	0.3595	1.4074	0.5531	1.4875	0.4252	0.2976
62	male	64	1.165	21	10	High motor skill	0.0263	-0.3298	0.0075	0.091	0.0326	0.1616	0.4664	0.7801	0.4923	0.1066	0.0795	-0.0943	-0.3387	-0.0527	-0.0265	-0.2967	0.0657	-0.1922	-0.4094	0.0546	0.0312	0.4392	0.1731	0.1362	0.2819	0.4723	0.5531	0.3727	0.362	0.5965	0.2164	0.6012	-0.212	0.8179	0.8499	0.3455	0.3794	0.3875	0.7095	0.6592	0.6203	0.577	0.2518
63	male	65	1.14	18.9	10	High motor skill	0.3271	0.076	0.328	0.3489	0.118	0.3338	0.0832	0.2125	0.2974	0.0181	-0.0178	0.6271	0.1137	0.1551	0.0364	0.4738	0.5731	0.499	0.1826	0.1035	0.1612	0.6409	0.5174	0.2357	0.5462	0.4773	0.574	0.5937	0.5311	1.1662	0.326	0.4781	0.4802	0.491	0.5381	1.0514	0.4538	0.9748	0.3438	0.7709	0.7375	0.535	0.3492
64	male	61	1.11	19	14	High motor skill	0.1466	0.2775	-0.1527	0.5766	0.424	0.6532	0.773	0.2082	-0.3332	0.6118	0.2774	0.3783	0.0252	0.3293	-0.0921	0.4867	0.0988	0.3886	2.7622	0.0532	0.1398	-0.2459	-0.0109	0.364	0.9047	1.1808	0.8766	1.1183	0.6414	1.2461	1.4905	0.418	0.2611	0.6745	0.7928	0.5053	1.2313	0.742	0.9463	1.1798	1.5913	0.9882	-1.0211
65	female	56	1.1	18.2	9	High motor skill	-0.0502	0.0315	-0.0981	0.1247	0.2944	0.1988	0.5969	-0.1107	-0.0062	0.2011	-0.3541	-0.2373	0.2602	-0.2461	0.4365	0.0912	0.4972	0.5584	0.6137	0.2734	0.6298	0.3569	0.5225	0.3745	0.4387	0.5205	0.4218	0.7001	0.8656	0.5211	1.0146	0.5542	0.3129	0.9488	-0.0272	0.3398	0.1637	-0.1772	0.8099	0.144	0.7471	0.5748	0.7488
66	female	61	1.11	19.5	11	High motor skill	-0.0175	0.4326	1.0782	0.2629	1.0639	0.3679	0.8814	0.6217	-0.202	0.3753	0.5301	-0.9779	-3.1952	0.4504	-0.935	0.4507	-0.3973	0.5632	-0.6041	-0.3928	0.4531	0.0166	0.2287	0.1359	0.2425	0.3526	-1.373	0.5806	-0.9927	0.7481	0.6637	0.4387	2.5601	-0.3094	0.5156	0.987	0.8428	0.3721	1.0095	0.5156	0.3573	0.6646	0.1336
67	male	58	1.155	20.1	13	High motor skill	0.3529	0.8567	1.1032	0.7449	0.418	0.9582	1.2347	0.4398	0.3051	0.7972	0.5916	0.8809	0.5576	0.3527	0.6591	0.2904	0.4183	0.6584	0.1091	0.1779	0.4336	0.5459	0.4809	0.1967	0.4779	1.2772	1.5254	0.4669	0.1532	0.7278	1.167	0.5314	0.4096	0.2592	0.4502	0.3547	-0.0468	-0.2276	-0.0584	0.4556	-0.0855	0.3407	0.2013
68	male	61	1.135	21.8	11	High motor skill	0.4091	0.4168	0.4176	0.1275	-0.1148	0.4373	-0.0195	-0.0326	0.0201	0.1619	0.4948	-0.3543	0.2283	0.4447	1.562	0.768	2.925	0.1991	0.073	1.0395	-0.4561	2.3816	0.114	0.1944	0.5249	1.043	0.1531	0.5742	0.3952	0.8343	0.7964	0.1818	0.3446	0.0626	0.4453	-0.0955	0.9524	0.5384	1.4376	0.4738	0.5988	0.3754	0.6177
69	female	57	1.09	19.6	11	High motor skill	0.103	-0.349	0.4794	0.5557	0.6678	0.6765	-0.2158	0.5366	-0.3283	-0.2339	0.0575	-0.6426	-0.3476	-0.0806	0.4353	0.5492	0.5188	0.0829	-0.4365	0.779	0.8365	0.5838	-0.0766	-0.205	0.4851	0.5538	0.5741	0.3421	0.2926	0.4191	0.5743	0.8676	0.2334	0.3131	0.3012	0.2554	0.4135	0.1721	0.3791	1.1373	0.5018	0.6678	0.5974
70	female	65	1.125	18.6	13	High motor skill	1.0011	1.6309	1.0868	1.9486	1.2119	0.9771	-0.1083	0.0684	0.1511	0.7423	1.0546	0.3851	0.3386	1.0086	1.2835	1.2052	1.3426	0.8026	1.0195	1.0166	1.4058	1.2791	1.206	1.1291	0.6622	1.5846	1.7432	2.0981	1.1646	1.9678	0.8151	0.5346	-0.5152	1.1023	0.9012	0.7825	1.3722	0.9189	0.9147	1.7364	0.1234	0.6225	0.6262
71	male	54	1.1	17.8	11	High motor skill	0.2544	0.4246	0.6952	0.4744	0.102	0.7702	0.4848	0.3756	0.7328	0.5814	0.4758	1.0999	0.9073	-0.3043	0.0842	0.2594	0.1809	0.8141	-0.2634	0.48	0.4929	0.9752	0.4001	-0.1144	0.6554	1.1581	1.5292	0.4424	0.6037	0.9424	1.2716	0.3757	0.7244	1.0378	0.3932	0.5799	0.7143	-0.6685	-0.387	0.8526	0.1574	1.3147	1.3122
72	male	60	1.07	18.2	14	High motor skill	0.5745	0.5818	1.3607	0.8062	0.6541	1.1623	1.1795	0.6481	0.904	0.3163	0.7387	0.3919	0.2471	0.0647	0.2225	0.5757	0.346	0.7034	0.3229	0.3705	1.3315	0.2677	0.5335	0.6645	0.6792	1.0336	1.6062	0.8974	0.726	1.4072	1.845	0.9952	1.6076	0.6072	0.8573	0.4771	0.314	-0.2993	0.2126	0.3885	0.2384	0.5428	0.5717
73	female	66	1.12	19.2	9	High motor skill	0.0569	0.0956	0.3113	0.8654	0.3066	1.0009	0.6401	0.4017	0.2323	0.4052	0.1209	0.3839	0.5303	0.1914	0.537	0.6837	0.3935	0.4709	0.2536	0.5665	0.4462	0.8036	0.0892	0.3741	0.7267	0.6066	1.0228	1.469	0.5921	1.41	1.0738	0.6654	0.1602	0.7062	0.2521	0.5302	0.485	0.294	0.7135	1.0084	0.3374	0.7618	0.0521
74	male	65	1.11	18.1	12	High motor skill	-0.0963	-0.047	0.0585	0.2037	0.3431	0.1009	0.4517	0.8117	0.5624	1.0746	0.5113	1.5351	0.3495	-0.1883	0.03	0.2618	0.1438	0.2429	0.2936	0.3861	0.047	0.0965	-0.3576	-0.452	-0.3183	0.1624	-0.2636	0.3773	-0.0335	0.9352	0.8589	0.7977	0.3082	1.1313	0.7258	1.0534	-0.1759	-0.2137	0.0048	0.0972	-0.056	0.2773	-0.1745
75	female	63	1.1	15.2	13	High motor skill	0.8188	1.0274	0.7211	0.4728	1.0829	0.9952	0.7833	0.0587	-0.0292	0.8412	1.1074	-0.1653	-0.6335	1.1537	-0.8974	1.8296	-0.6548	1.5216	0.4277	0.9872	1.1153	0.3689	0.4579	0.6621	0.4881	0.324	-0.1107	-0.0969	0.8629	0.4742	0.275	-0.0119	0.1589	0.4735	0.0611	-0.213	-0.3309	-0.2936	-0.7955	0.7863	-0.0454	0.5096	1.5386
76	female	58	1.11	22.3	10	High motor skill	-0.3309	-0.5265	-1.0203	-0.0686	-0.4318	-0.4558	-1.594	-0.6906	-0.7827	-0.5478	-0.4911	-0.6638	-1.3296	0.0063	-0.1178	-0.5188	-0.0899	0.3564	-0.7096	0.1947	-0.9207	-1.2047	-0.2154	0.0598	0.1102	0.0735	0.6076	0.3927	0.8157	0.4066	0.553	0.6197	0.565	0.9989	-0.1547	0.7541	0.889	0.041	1.1214	0.2686	0.9632	0.1258	0.7921
77	female	60	1.15	22.5	13	High motor skill	-0.2459	0.9003	0.7282	0.1146	0.2315	0.2423	0.8125	0.395	0.0785	0.1927	-0.2695	-0.1631	-0.0238	0.2846	0.4839	0.631	0.7328	0.8239	0.0544	0.2891	0.4727	0.3363	0.4284	0.1247	0.4549	0.4667	1.0698	0.0659	1.0206	0.0579	0.3669	0.0833	-0.3312	1.3711	0.0539	0.7955	0.2413	0.1375	0.8651	-0.0977	0.6184	-0.1812	-0.1022
78	female	55	1.12	19	12	High motor skill	0.8246	1.1976	1.289	0.8789	0.8273	0.4831	0.5462	0.4918	0.0103	0.9225	0.6322	0.9559	0.401	0.3922	0.4635	0.4614	0.7946	0.8518	1.5182	0.5431	0.3929	0.8429	0.8106	0.7639	0.5509	1.2475	1.1067	0.4814	0.9173	0.7027	0.7351	0.6681	1.7814	1.1026	0.7887	0.9646	1.2783	0.5899	0.7326	0.7262	0.5533	0.2652	0.3657
79	male	65	1.16	23.5	12	High motor skill	-1.0796	-0.1545	-0.0094	0.329	0.3206	-0.1472	0.5766	0.4763	0.4575	0.196	-0.4488	0.1913	-0.1432	-0.4447	0.3885	-0.1663	0.2568	-0.0399	-0.1949	0.1505	0.0358	0.262	-0.0382	-0.3061	0.7928	0.7774	1.0968	0.1747	0.9595	0.928	1.3302	1.2606	1.0038	0.7361	0.7824	0.6317	0.4304	0.4494	0.698	0.8166	0.9211	0.9215	0.6857
80	male	60	1.11	20.8	15	High motor skill	0.3315	0.4487	1.2118	0.4166	-0.4184	0.9475	0.8134	-2.5216	-1.3563	-0.9336	0.032	-1.4112	-0.8229	0.3585	-0.515	0.9963	-0.0181	0.7249	-0.6845	-0.7269	0.6671	0.3816	0.1703	0.1145	0.6473	0.565	1.1131	0.9519	0.5988	0.9791	0.7149	-0.1889	-0.5223	-0.3452	0.0849	-0.039	0.5274	0.6174	0.643	0.8396	0.978	0.5331	1.9698
81	male	66	1.17	21.7	10	High motor skill	-0.0671	0.1322	0.764	0.6292	0.7874	0.2465	0.3933	0.1339	0.1009	0.9019	0.3218	0.5698	0.1444	0.0408	0.2978	0.0136	0.5971	0.6147	0.454	0.0347	0.4763	0.1838	-0.1589	0.1777	0.1033	-0.0761	0.316	0.4324	0.9907	0.4348	-0.4841	0.1542	0.0987	0.5572	0.5998	0.4181	0.3037	0.7328	0.8242	0.7258	1.4016	0.5485	0.9434
82	female	66	1.145	19.2	11	High motor skill	0.0503	0.0612	0.6538	0.3853	0.6817	0.671	-0.0952	-0.0009	-0.1049	0.2141	0.5007	-0.0254	0.1376	0.1939	0.2652	0.6304	0.7213	0.5087	-0.0123	0.29	0.7716	0.8483	0.6214	0.2935	0.5505	1.0271	1.158	0.4371	0.5325	0.8374	0.4999	0.3949	0.426	0.6207	0.9423	0.4184	0.4277	0.4353	0.9356	0.5215	0.6948	0.5052	0.2752
83	female	57	1.13	20	11	High motor skill	0.4591	0.1967	0.5845	0.8718	0.518	0.3762	0.2273	0.3786	0.178	0.4021	0.3023	0.2557	0.5914	0.3153	0.7778	0.6284	0.7067	0.438	-0.2915	0.1549	0.1948	1.0143	0.2167	-0.1707	0.8235	0.5914	1.1146	0.6248	0.5409	0.3049	0.7402	0.5678	0.6548	0.3314	0.1949	0.1734	0.2421	0.0521	0.4941	0.3267	0.2783	0.5618	0.3244
84	male	56	1.12	19.4	13	High motor skill	-0.1052	0.1312	0.0739	0.4623	0.1317	0.1337	0.011	-0.3046	-0.8138	0.0346	-0.3429	-0.1751	-0.2023	-0.3358	0.0786	-0.1199	0.0581	0.0709	-0.9002	-0.9738	-0.5409	-0.1185	-0.0414	-0.1787	0.3022	0.4351	0.6567	0.6726	0.3567	0.5084	0.3669	0.3621	0.2563	0.2297	-0.0964	-0.1076	-0.1344	-0.1564	0.278	0.5441	0.8257	0.5342	0.2249
85	male	59	1.1	18.1	9	High motor skill	0.2785	0.0422	-0.493	-0.0642	-0.0557	-0.0687	0.1445	-0.8962	0.2365	-1.3087	-1.1208	-0.9991	4.8559	-0.2038	0.6513	-0.3156	0.1832	0.099	4.9754	0.4609	-0.7533	-0.799	-0.0243	0.6656	0.2253	-0.0588	-0.1438	0.3149	0.1923	0.5781	-0.1441	0.0835	0.0002	0.2033	-0.0102	0.4974	-1.0038	0.2175	0.2358	0.7752	0.4658	0.584	-1.1675
86	female	54	1.05	18.6	10	High motor skill	0.6616	0.6867	0.621	0.3439	0.8996	0.622	0.1935	1.0696	-0.0785	0.5437	0.4622	1.1605	0.5351	0.4592	0.7046	0.8267	0.0259	0.7847	0.6572	2.5065	1.1327	1.8296	3.4222	0.3019	0.113	1.0254	1.8047	-0.3418	0.6098	0.8215	0.4779	4.8618	1.9229	3.1236	0.5085	4.1185	3.8165	0.3042	3.0203	1.0791	0.455	1.381	3.5881
87	female	55	1.1	17.3	14	High motor skill	-0.2202	-0.2373	-0.0782	-0.094	0.2202	-0.0632	-0.0861	0.0808	-0.131	-0.0737	-0.3903	-0.1404	0.0241	-0.0507	0.1366	0.0216	0.3438	0.0525	0.0212	0.1184	-0.6712	-0.108	-0.8348	-0.3184	0.2552	0.1406	0.143	0.5935	0.1915	0.3546	0.2481	0.319	0.5754	0.469	-0.0047	0.8156	0.5888	-0.0151	-0.3811	0.402	0.4386	0.3278	1.1538
88	male	63	1.1	19.5	9	High motor skill	-0.5701	-0.1913	0.2286	-0.6712	0.024	-0.3941	-0.239	-0.0508	-0.7569	-0.3776	-0.5853	-0.7568	-0.524	-0.6816	-0.6816	-0.739	-0.4768	-0.2178	-0.1402	-0.1332	0.0254	-0.5711	-0.1774	-0.2407	0.4043	0.2516	-0.0878	-0.2282	0.402	0.2259	0.0159	-0.0509	-0.6972	0.053	0.1641	-0.8106	0.0718	0.1329	-0.8942	-0.1607	-1.2956	0.2305	0.0173
89	male	59	1.095	18.9	9	High motor skill	0.0201	-0.638	0.8385	-0.5013	-0.6618	-0.8565	0.1142	0.0623	0.1377	-0.5716	-0.9427	-0.9232	-0.1247	-1.0782	-0.9267	-0.4698	-0.2337	-0.3566	0.0714	-0.0189	-0.1564	0.8073	-0.0082	-0.5375	0.1844	-0.3761	0.2404	0.5074	0.0894	-0.0211	-0.2295	0.1004	0.0878	0.0823	-0.362	-0.3653	-0.2527	-0.1092	0.2561	0.3249	0.1231	0.2731	-0.7976
90	male	62	1.06	18	11	High motor skill	0.2535	0.6177	0.6585	0.5353	-0.0427	0.4478	0.3777	0.4014	0.3217	-0.1116	0.1944	-0.1641	-0.2107	-0.457	-0.4318	0.1589	-1.0254	0.1359	-0.7635	-0.5494	-2.9408	0.8048	-0.7031	-0.2142	0.2002	1.1759	0.8594	0.3772	-0.1698	0.488	0.996	0.5087	0.6167	-0.2604	0.3661	-0.0439	0.111	-0.3355	-0.3188	0.4792	-0.4102	0.349	0.1128
91	male	58	1.135	19.8	11	High motor skill	-0.2271	-0.4712	-0.2358	-0.0762	-0.1334	-0.2817	-0.1832	0.7669	0.2348	-0.2953	-0.5801	-0.4878	-0.3829	-0.1738	-0.0946	-0.1686	-0.0315	0.0898	-0.5135	0.0273	-0.348	-0.0716	-0.1916	-0.0336	0.1714	0.37	-0.3987	-0.0166	-0.3753	0.1695	0.5457	-0.1556	0.044	-0.6751	-0.0835	0.1241	0.4668	0.1238	0.0877	0.1869	0.1259	0.2083	0.1803
92	female	61	1.105	18.4	12	High motor skill	0.5636	0.6001	0.897	0.7716	0.3285	0.7725	0.4029	0.8706	-0.0624	0.3217	0.638	0.3731	0.1525	0.7521	0.6359	0.7728	0.7961	0.4721	-0.5331	-0.4487	0.3018	0.8752	0.3269	0.1603	0.4118	0.4129	0.8822	0.8057	0.5001	0.8728	0.4031	0.5713	0.7669	0.3858	0.3947	0.5301	0.588	0.7661	0.8608	0.6653	0.66	0.7918	0.6507
93	female	59	1.037	17.6	13	High motor skill	0.3569	0.6902	1.0613	0.2132	0.2372	0.1399	0.8588	0.9679	-0.072	0.0644	-0.4692	-0.6549	0.7006	0.4509	0.8257	0.0293	0.4548	-0.3511	1.7123	2.0523	0.634	0.9928	0.018	-0.3006	-0.2952	0.0078	0.0303	-0.5074	-0.2492	-0.3509	0.6898	0.9199	0.9458	-0.5783	-1.1468	-0.7384	0.8732	0.3772	1.7064	-0.1946	0.799	-0.6596	2.762
94	female	65	1.143	22	14	High motor skill	0.2496	-0.3845	-0.3264	0.352	-0.2581	-0.11	-0.4258	-0.4401	1.3719	-0.4199	-0.4078	0.378	-0.2306	-2.0044	-0.6296	-0.662	-0.1087	-0.5056	1.2758	1.9753	-0.2477	-0.1442	-0.5519	0.0816	0.5061	0.6488	0.6572	0.6797	0.4073	0.7838	0.8965	0.3998	1.3497	0.34	0.3877	0.6547	0.0837	0.2203	0.6158	0.8694	0.385	0.4553	0.5949
95	male	62	1.092	20	15	High motor skill	-0.0789	-0.0045	0.4276	-0.0767	0.2627	0.0623	-0.4953	-0.3532	0.904	0.5738	0.083	0.818	0.2148	-0.0066	0.155	0.4586	0.0485	0.2043	-0.0739	-0.0575	-0.427	-0.1804	-0.1694	0.0865	0.8143	1.051	0.7526	0.6777	0.3414	0.8152	0.8834	0.6407	0.8181	0.4478	0.3352	0.3332	0.4545	0.7258	0.6157	1.2018	0.5175	0.4902	1.1172
96	female	65	1.142	22.3	12	High motor skill	0.0282	-0.1231	0.3049	0.0474	0.0043	0.2534	0.295	0.3215	0.1977	0.4223	-0.3066	0.5504	-0.2282	-0.2081	0.199	0.1521	0.1012	-0.0803	-0.1849	0.215	0.0228	-0.3365	-0.5346	-0.2802	0.2855	0.6282	0.4303	0.6418	-0.2505	0.722	1.0167	0.6244	0.9992	0.117	-0.2682	0.6218	-0.038	-0.0687	0.3132	0.6495	0.5017	0.4345	0.1685
97	female	60	1.106	20.5	14	High motor skill	0.2054	0.1298	0.5765	0.162	0.1908	0.1927	-0.0286	-0.2462	-0.435	-0.3046	-0.3595	-0.8726	-0.3931	0.2761	0.3432	0.6676	0.8575	0.4154	-0.244	0.5481	-0.2955	0.6924	-0.2939	0.1502	0.7308	0.6312	1.2046	0.4347	0.5694	0.4607	0.8758	0.5278	0.5715	0.8002	0.5997	0.539	0.4089	0.3514	0.5446	0.6184	0.0184	0.576	0.2632
98	male	56	1.12	23.3	12	High motor skill	0.921	0.6518	1.2352	0.8596	0.5548	0.5151	0.6964	0.5191	0.8931	0.6189	0.4348	0.6943	0.6759	0.5183	0.7091	1.0511	0.5995	0.6522	0.3544	0.3475	0.7454	0.6122	0.5134	0.2278	1.0325	0.7551	1.6527	1.0107	0.9551	0.7012	1.3467	0.8493	1.0482	0.9978	0.5893	0.5051	0.6016	0.2182	0.5651	0.8128	0.5121	0.7508	0.6178
99	female	64	1.123	29.8	9	High motor skill	0.2332	0.1914	0.0538	0.1158	0.2182	0.1953	0.0827	-0.0834	-0.3609	-0.078	0.1985	-0.2378	0.3104	0.2212	0.4776	0.1756	0.5085	0.2632	0.1432	-0.0006	0.2608	0.7289	0.4047	0.0913	0.3063	0.2046	0.2842	0.4767	0.2515	0.5652	-0.0232	0.0119	0.5968	0.0167	0.5537	0.0569	0.293	0.442	0.5519	0.5393	0.335	0.4325	0.8012
100	female	59	1.105	19	9	High motor skill	0.1241	0.1537	0.1622	0.078	0.3577	-0.0516	0.2636	0.1605	-0.0012	0.3432	0.2044	0.7588	0.7319	0.2981	0.1736	0.0071	-0.1147	-0.0114	0.4296	0.1156	0.0714	0.0312	0.2262	-0.0596	0.2441	-0.0729	0.7116	0.2453	0.4449	0.0872	0.0724	0.3322	0.2692	0.3966	0.1689	1.0637	0.6558	0.4816	0.3342	0.629	0.3407	0.4999	0.5013
101	male	65	1.153	24.5	11	High motor skill	0.3417	0.6842	0.1437	0.3351	0.1189	0.1374	-1.9648	0.7816	1.002	0.4303	0.2309	0.6718	0.2906	0.2303	0.1833	0.6197	0.0603	0.3782	0.2183	0.0154	0.5368	0.4321	0.426	0.2846	0.4404	0.2969	0.3709	0.3537	0.2176	0.1895	0.2853	1.3055	1.0843	0.5478	0.3052	0.9137	0.5251	0.3993	0.1906	0.6142	0.207	0.1888	0.0485
[truncated: 21 more columns]
